# Supplementary material
Source: Elsevier journal article supplement (https://www.sciencedirect.com/science/article/pii/S1885585718302226)

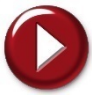**Material suplementario**

---

## Utilidad de la puntuación PARIS para evaluar el equilibrio isquémico-hemorrágico con ticagrelor y prasugrel tras un síndrome coronario agudo

---

**Tabla 1 del material suplementario**

Lista de variables del registro RENAMI

| <i>Variables basales</i>                         |
|--------------------------------------------------|
| Fecha de ingreso (variable fecha)                |
| Fecha de nacimiento (variable fecha)             |
| Edad (variable continua; años)                   |
| Sexo (varón o mujer)                             |
| Diabetes mellitus (sí/no)                        |
| Hipertensión arterial (sí/no)                    |
| Dislipemia (sí/no)                               |
| Tabaquismo (sí/no)                               |
| Peso (variable continua; kg)                     |
| Talla (variable continua; cm)                    |
| Historia de cáncer en los últimos 5 años (Sí/no) |
| Ingreso previo por hemorragia (sí/no)            |
| Enfermedad arterial periférica (sí/no)           |
| Ictus isquémico previo (sí/no)                   |
| Infarto agudo de miocardio previo (sí/no)        |

|                                                                                                                                                     |
|-----------------------------------------------------------------------------------------------------------------------------------------------------|
| ICP previa (sí/no)                                                                                                                                  |
| <i>Modo de presentación</i>                                                                                                                         |
| Tipo de síndrome coronario agudo (angina inestable/infarto agudo de miocardio sin elevación del ST/infarto agudo de miocardio con elevación del ST) |
| Parada cardíaca al ingreso (sí/no)                                                                                                                  |
| Clase Killip (I/II/III/IV)                                                                                                                          |
| Frecuencia cardíaca al ingreso (variable continua; lpm)                                                                                             |
| Presión arterial al ingreso (variable continua; mmHg)                                                                                               |
| Fibrilación auricular al ingreso (sí/no)                                                                                                            |
| Creatinina al ingreso (variable continua; mg/dl)                                                                                                    |
| Hemoglobina al ingreso (variable continua; g/dl)                                                                                                    |
| Hematocrito al ingreso (variable continua; %)                                                                                                       |
| <i>Tratamiento durante la hospitalización</i>                                                                                                       |
| Coronariografía (sí/no)                                                                                                                             |
| Enfermedad multivaso (2 o más arterias coronarias con estenosis $\geq 70\%$ )                                                                       |
| Estenosis de tronco de coronaria izquierda $\geq 50\%$ (sí/no)                                                                                      |
| Tipo de <i>stent</i> (metálico o farmacoactivo)                                                                                                     |
| Tipo de <i>stent</i> farmacoactivo (variable nominal)                                                                                               |
| Fecha de ICP (variable fecha)                                                                                                                       |
| Tipo de acceso (femoral/radial)                                                                                                                     |
| Anticoagulación (heparina sódica/heparina de bajo peso molecular/fondaparinaux/bivalirudina)                                                        |
| Anti-glucoproteína IIb-IIIa (sí/no)                                                                                                                 |
| <i>Eventos hospitalarios</i>                                                                                                                        |
| Hemorragia durante el ingreso (sí/no; clasificación BARC)                                                                                           |
| Infarto agudo de miocardio durante el ingreso (elevación de troponina con o sin clínica o cambios electrocardiográficos)                            |

|                                                                                     |
|-------------------------------------------------------------------------------------|
| Ictus isquémico durante el ingreso (sí/no)                                          |
| Fibrilación auricular durante el ingreso (sí/no)                                    |
| Fracción de eyección del ventrículo izquierdo antes del alta (variable continua; %) |
| <i>Tratamiento al alta</i>                                                          |
| Ácido acetilsalicílico al alta (sí/no)                                              |
| Ticagrelor al alta (sí/no)                                                          |
| Prasugrel al alta (sí/no)                                                           |
| Anticoagulación al alta (sí/no)                                                     |
| <i>Seguimiento</i>                                                                  |
| Fecha de último seguimiento (variable fecha)                                        |
| Muerte (sí/no)                                                                      |
| Causa de la muerte (variable nominal)                                               |
| Fecha de muerte (variable fecha)                                                    |
| Hemorragia durante el seguimiento (clasificación BARC)                              |
| Fecha de hemorragia (variable fecha)                                                |
| Recurrencia de síndrome coronario agudo durante el seguimiento (sí/no)              |
| Fecha de la recurrencia de síndrome coronario agudo (variable fecha)                |
| Reinfarto durante el seguimiento (sí/no)                                            |
| Fecha de reinfarto (variable fecha)                                                 |
| Trombosis del <i>stent</i> durante el seguimiento (sí/no)                           |
| Fecha de trombosis (variable fecha)                                                 |
| Ictus durante el seguimiento (sí/no)                                                |
| Fecha de ictus (variable fecha)                                                     |
| Fecha de suspensión/cambio de TAPD (variable fecha)                                 |
| Motivo de suspensión/cambio de TAPD (variable nominal)                              |

BARC: *Bleeding Academic Research Consortium*; ICP: intervención coronaria percutánea; TAPD: tratamiento antiagregante plaquetario doble.

**Tabla 2 del material suplementario**

Centros participantes en el registro RENAMI. Hospitales universitarios de tercer nivel que disponían de sala de hemodinámica las 24 horas, con registros clínicos internos sobre síndrome coronario agudo

| País        | Centro   | Pacientes, n | Periodo   | Ticagrelor/prasugrel, % |
|-------------|----------|--------------|-----------|-------------------------|
| España      | Center 1 | 625          | 2013-2016 | 76,5/23,5               |
|             | Center 2 | 303          | 2013-2015 | 39,6/60,4               |
|             | Center 3 | 282          | 2013-2015 | 51,15/48,9              |
| Reino Unido | Center 1 | 641          | 2013-2015 | 19,5/80,5               |
| Suiza       | Center 1 | 415          | 2012-2015 | 60,0/40,0               |
| Serbia      | Center 1 | 338          | 2013-2015 | 99,4/0,6                |
| Grecia      | Center 1 | 677          | 2012-2013 | 53,3/46,7               |
| Italia      | Center 1 | 533          | 2012-2015 | 94,6/5,4                |
|             | Center 1 | 225          | 2013-2015 | 68,9/31,1               |
|             | Center 1 | 220          | 2013-2015 | 74,5/25,5               |
|             | Center 1 | 165          | 2014-2015 | 53,9/46,1               |

**Tabla 3 del material suplementario**

Escalas de riesgo PARIS para eventos hemorrágicos e isquémicos

| Score PARIS isquémico |            | Score PARIS hemorrágico |            |
|-----------------------|------------|-------------------------|------------|
| Parámetro             | Puntuación | Parámetro               | Puntuación |
| Diabetes mellitus     |            | Edad                    |            |
| Insulinoterapia       | +1         | < 50                    | 0          |
| No insulinoterapia    | +3         | 50-59                   | +1         |
| SCA                   |            | 60-69                   | +2         |
| No                    | 0          | 70-79                   | +3         |
| Angina inestable      | +1         | ≥ 80                    | +4         |
| Infarto               | +2         | IMC, Kg/m <sup>2</sup>  |            |
| Tabaquismo activo     | +1         | <25                     | +2         |
| ClCr < 60 ml/min      | +2         | 25-34.9                 | 0          |
| ICP previa            | +2         | ≥ 35                    | +2         |
| CABG previa           | +2         | Tabaquismo activo       | +2         |
|                       |            | Anemia                  | +3         |
|                       |            | ClCr < 60 ml/min        | +2         |
|                       |            | Triple terapia          | +2         |

CABG: cirugía de revascularización coronaria; ClCr: aclaramiento renal de creatinina; ICP: intervención coronaria percutánea; IMC: índice de masa corporal; SCA: síndrome coronario agudo.

Los valores de la puntuación PARIS oscilan entre 0 y 12 puntos para eventos isquémicos y entre 0 y 15 puntos para eventos hemorrágicos. Según la puntuación PARIS, se establecen 3 grupos de riesgo isquémico y hemorrágico: bajo riesgo (entre 0 y 2 puntos para PARIS<sub>isquémico</sub>, entre 0 y 3 puntos para la PARIS<sub>hemorrágico</sub>), riesgo intermedio (de 3 a 4 puntos para la PARIS<sub>isquémico</sub>, de 4 a 7 puntos para la PARIS<sub>hemorrágico</sub>) y alto riesgo (≥ 5 y 8 puntos para PARIS<sub>isquémico</sub> y PARIS<sub>hemorrágico</sub>, respectivamente).

Tabla 4 del material suplementario

Características basales de la población de estudio con datos completos

| Variables                      | Eventos isquémicos |                   |         | Eventos hemorrágicos |                   |       |
|--------------------------------|--------------------|-------------------|---------|----------------------|-------------------|-------|
|                                | Sí (n = 73)        | No<br>(n = 3.383) | p       | Sí (n = 43)          | No<br>(n = 3.413) | p     |
| <i>Edad (años)</i>             | 63,9 ±<br>13,0     | 61,0 ± 11,3       | 0,062   | 65,5 ± 9,9           | 61,0 ±<br>11,3    | 0,010 |
| <i>Mujeres</i>                 | 27,4               | 21,0              | 0,182   | 32,6                 | 20,9              | 0,064 |
| <i>IMC</i>                     | 27,8 ± 4,6         | 27,6 ± 4,5        | 0,737   | 27,4 ± 4,4           | 27,6 ± 4,5        | 0,785 |
| <i>HTA</i>                     | 68,5               | 54,0              | 0,014   | 67,4                 | 54,1              | 0,081 |
| <i>Diabetes mellitus</i>       | 41,1               | 29,8              | 0,037   | 30,0                 | 27,9              | 0,763 |
| Insulinodependiente            | 13,7               | 8,8               | 0,144   | 8,9                  | 7,0               | 0,658 |
| <i>Dislipemia</i>              | 64,4               | 54,3              | 0,087   | 74,4                 | 54,3              | 0,008 |
| <i>Fumadores activos</i>       | 28,8               | 29,7              | 0,866   | 25,6                 | 29,7              | 0,556 |
| <i>Arteriopatía periférica</i> | 12,1               | 3,6               | 0,011   | 11,5                 | 3,7               | 0,037 |
| <i>IAM previo</i>              | 30,1               | 16,6              | 0,002   | 14,0                 | 16,9              | 0,611 |
| <i>ICP previa</i>              | 38,4               | 17,8              | < 0,001 | 16,3                 | 18,3              | 0,735 |
| <i>CABG previa</i>             | 0,0                | 0,7               | 0,480   | 4,7                  | 0,6               | 0,001 |
| <i>Ictus isquémico previo</i>  | 8,2                | 5,2               | 0,254   | 4,7                  | 5,3               | 0,856 |
| <i>Cáncer</i>                  | 4,1                | 5,0               | 0,739   | 7,0                  | 4,9               | 0,537 |
| <i>Angina inestable</i>        | 6,8                | 7,9               | 0,737   | 11,6                 | 7,9               | 0,362 |
| <i>IAMCEST</i>                 | 52,1               | 57,6              | 0,347   | 55,8                 | 57,5              | 0,829 |
| <i>FEVI &lt; 40%</i>           | 21,9               | 9,2               | < 0,001 | 7,0                  | 9,5               | 0,571 |
| <i>Anemia</i>                  | 6,8                | 2,6               | 0,025   | 7,0                  | 2,6               | 0,077 |
| <i>ClCr &lt; 60 ml/min</i>     | 24,7               | 16,1              | 0,049   | 16,3                 | 11,6              | 0,407 |

|                                          |      |      |       |      |      |       |
|------------------------------------------|------|------|-------|------|------|-------|
| <i>Stent farmacoactivo</i>               | 71,2 | 76,9 | 0,261 | 72,1 | 76,8 | 0,468 |
| <i>Anticoagulación oral</i>              | 4,1  | 1,8  | 0,148 | 4,7  | 1,8  | 0,171 |
| <i>TAPD con ticagrelor</i>               | 68,5 | 62,4 | 0,285 | 69,8 | 62,4 | 0,322 |
| <i>TAPD con prasugrel</i>                | 31,5 | 37,6 |       | 30,2 | 37,6 |       |
| <i>Inhibidor de la bomba de protones</i> | 42,1 | 55,7 | 0,236 | 78,6 | 55,0 | 0,013 |

CABG: cirugía de revascularización coronaria; ClCr: aclaramiento de creatinina; TAPD: doble antiagregación plaquetaria; FEVI: fracción de eyección del ventrículo izquierdo; HTA: hipertensión arterial; ICP: intervención coronaria percutánea; IAM: infarto agudo de miocardio; IAMCEST: infarto agudo de miocardio con elevación del segmento ST; IMC: índice de masa corporal; SCA: síndrome coronario agudo.

Los valores expresan porcentaje o media  $\pm$  desviación estándar.





|                            |      |            |       |      |           |       |
|----------------------------|------|------------|-------|------|-----------|-------|
| $\geq 35$                  | 0,38 | 0,13-1,17  | 0,340 | 0,44 | 0,14-1,36 | 0,155 |
| <i>Tabaquismo</i>          | 0,81 | 0,24-2,77  | 0,733 | 1,01 | 0,29-3,55 | 0,988 |
| <i>Anemia</i>              | 2,67 | 1,44-4,97  | 0,002 | 2,75 | 1,47-5,14 | 0,002 |
| <i>ClCr &lt; 60 ml/min</i> | 1,43 | 0,56-3,67  | 0,456 | 2,77 | 0,94-8,21 | 0,065 |
| <i>Triple terapia</i>      | 3,02 | 0,73-12,52 | 0,127 | 2,91 | 1,06-8,02 | 0,158 |

AI: angina inestable; CABG: cirugía de revascularización coronaria; ClCr: aclaramiento renal de creatinina; DM: diabetes mellitus; DMID: diabetes mellitus insulino dependiente; DMNID: diabetes mellitus no insulino dependiente; FEVI: fracción de eyección del ventrículo izquierdo; IC95%: intervalo de confianza del 95%; IAM: infarto agudo de miocardio; ICP: intervención coronaria percutánea; IMC: índice de masa corporal; PARIS: *Patterns of non-adherence to Antiplatelet Regimens In Stented patients*; sHR: *subhazard ratio*; TAPD: doble antiagregación plaquetaria.

**Figura 1 del material suplementario.** Curvas de Kaplan-Meier de PARIS<sub>isquémico</sub>. Como variable continua, HR = 1,25 (IC95%, 1,08-1,45; p = 0,004); como variable categórica: moderado frente a bajo riesgo, HR = 1,46 (IC95%, 0,68-3,14; p = 0,329); alto frente a bajo riesgo, HR = 3,07 (IC95%, 1,76-5,35; p < 0,001). Estadístico C de Harrell de mortalidad, para PARIS<sub>isquémico</sub>. Como variable continua, C = 0,65 (IC95%, 0,61-0,69); como variable categórica, C = 0,63 (IC95%, 0,59-0,67). HR: *hazard ratio*; IC95%: intervalo de confianza del 95%.

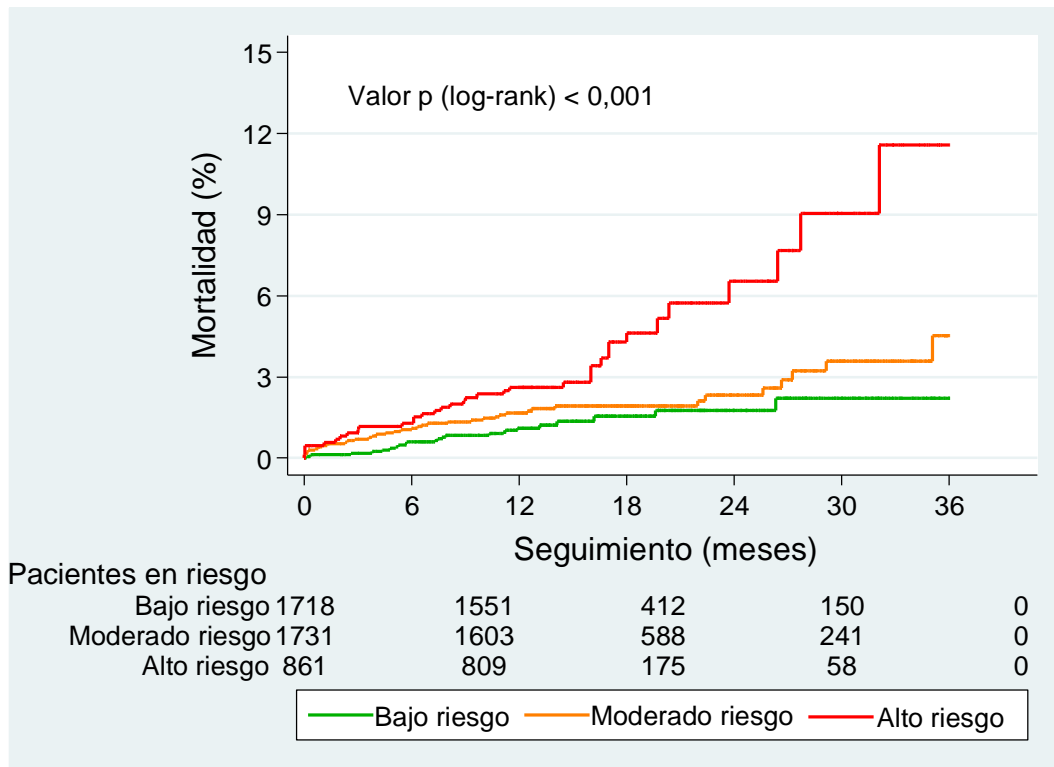

**Figura 2 de material suplementario.** Prueba de asunción de riesgos proporcionales para la puntuación PARIS<sub>isquémico</sub>.

$\chi^2 = 3,08$ ;  $p = 0,2142$ . Isq\_cat: categorías del riesgo de la puntuación PARIS<sub>isquémico</sub>.

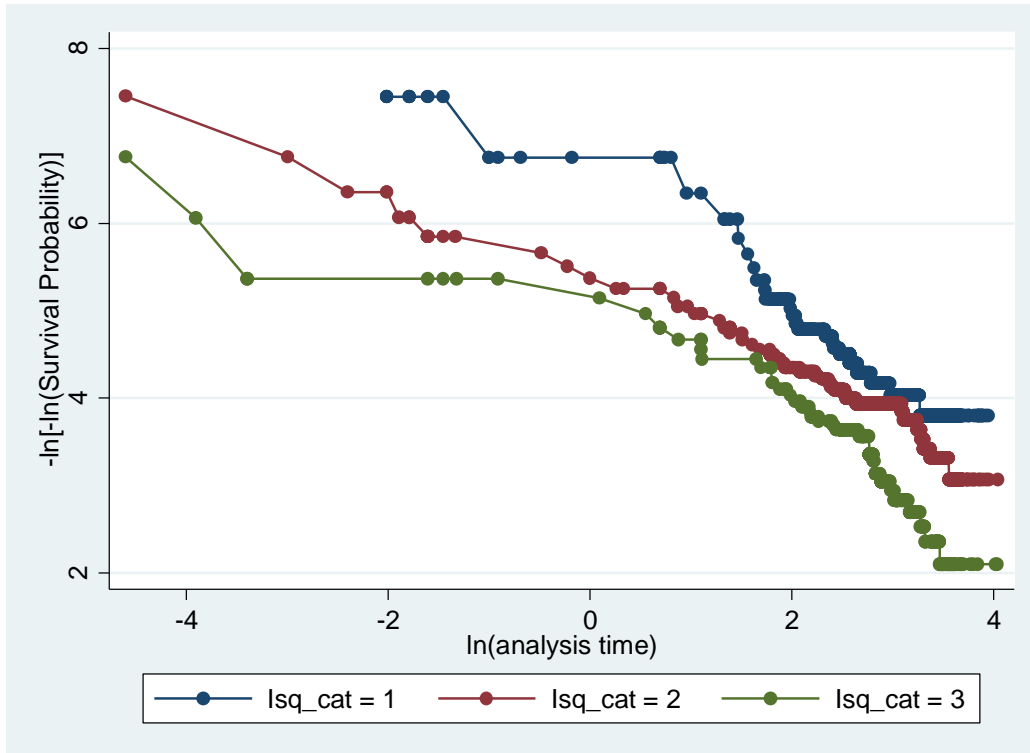

**Figura 3 de material suplementario.** Curvas de Kaplan-Meier de PARIS<sub>hemorrágico</sub>. PARIS<sub>hemorrágico</sub> para mortalidad: como variable continua, HR = 1,31 (IC95%, 1,19-1,43; p < 0,001); como variable categórica: moderado frente a bajo riesgo, HR = 2,47 (IC95%, 1,59-3,86; p < 0,001); alto frente a bajo riesgo, HR = 5,79 (IC95%, 4,17-8,05; p < 0,001). Estadístico C de Harrell para mortalidad, para PARIS<sub>hemorrágico</sub>: como variable continua, C = 0,60 (IC95%, 0,57-0,64); como variable categórica, C = 0,60 (IC95%, 0,56-0,64).

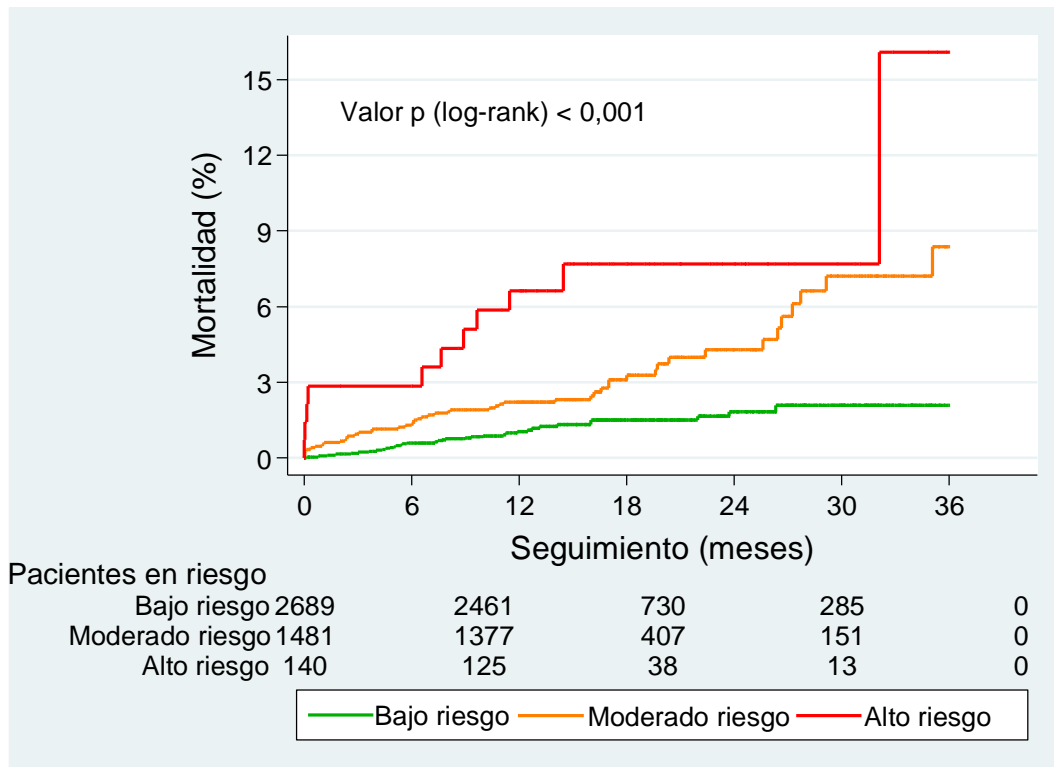

**Figura 4 de material suplementario.** Prueba de asunción de riesgos proporcionales para la puntuación PARIS<sub>hemorrágico</sub>.

$\chi^2 = 1,32$ ;  $p = 0,517$ . Bleed\_cat: categorías de riesgo de la puntuación PARIS<sub>isquémico</sub>.

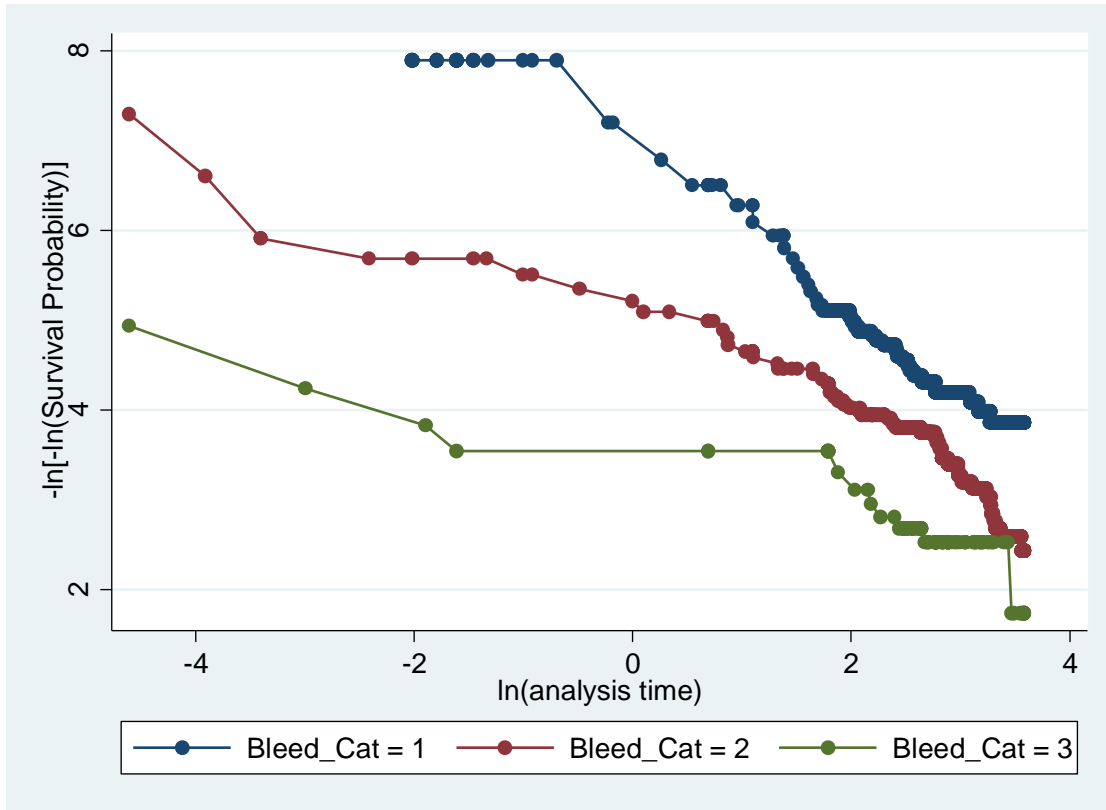

Supplement: mmc1 [file mmc1.pdf]
